# Supplementary material for: Diet quality and Parkinson’s disease: Potential strategies for non-motor symptom management
Source: PubMed Central journal article supplement (PMC11121503; doi:10.1016/j.parkreldis.2023.105816), 2023-08-19
Supplement: NIHMS1990725-supplement-Supplemental_Material.pdf [file NIHMS1990725-supplement-Supplemental_Material.pdf]

## **Supplementary materials**

### **Diet quality and Parkinson's disease: potential strategies for non-motor symptom management**

D Kwon et al.

Supplementary materials are divided into two sections:

Section I reports further details on dietary patterns.

Section II reports additional analyses supporting those reported in the main text of this article.

## **I. Dietary patterns**

The National Cancer Institute questionnaire allowed us to generate three different diet quality scores to assess dietary patterns: the HEI-2015 [1], AHEI-2010 [2], and aMED [3] according to validated analytical procedures for this instrument (Table S1). Specifically, the HEI-2015 was developed based on the Update of the Healthy Eating Index [1] and contains 13 components (total vegetables, greens and beans, total fruit, whole fruit, whole grains, refined grains, dairy, total meat, seafood or plant protein, fatty acids, polyunsaturated to saturated fatty acid ratio, sodium, and added sugars) reflecting recommendations based on 2015-2020 Dietary Guidelines for Americans. The intake of foods and nutrients is represented on a density basis, as amount per 1,000 kcal. Each component is scored from 0 (indicating worst diet quality) to 5 or 10 (indicating best diet quality). Better scores are given to a higher intake of vegetables, fruits, whole grains, dairy, seafood or plant protein, polyunsaturated to saturated fatty acid ratio; a lower intake of refined grains, total meat, and added sugars. Thus, the total HEI ranges from 0 (worst) to 100 (best) points.

The AHEI was developed to improve on disease risk prediction [2]. The AHEI-2010 includes 11 components (vegetables, fruits, whole grains, juice, nuts and legumes, red and processed meat, trans fats, long-chain fats, polyunsaturated fatty acid, sodium, and alcohol), each with a score of 0 (indicating worst diet quality) to 10 (indicating best diet quality) and a total score ranging from 0 (worst) to 110 (best) points. Better scores are assigned to a higher intake of vegetables, fruits, whole grains, nuts and legumes, long-chain fats, and polyunsaturated fatty acids; a lower intake of juice, red and processed meat, trans fats, and sodium; and a light to moderate intake of alcohol.

The aMED is based on the traditional Mediterranean diet scale in the Greek population [4, 5]. This scale was modified using a food frequency questionnaire developed for the United States population's diet [3, 6] and is based on the intake of 9 components (vegetables without potato products, fruits, whole grains, nuts, legumes, fish, polyunsaturated to saturated fatty acid ratio, red and processed meat, and alcohol). For intake of the first seven items above the median of all study subjects, a person receives 1 point (indicating adherence); all others reporting less receive a 0 (indicating nonadherence). For alcohol, 1 point is assigned for intake between 5 and 15 g/d (Table S1). For red and processed meat, an intake below the median receives 1 point. Adherence

corresponds to a higher intake of vegetables, fruits, whole grains, nuts, legumes, fish, and polyunsaturated to saturated fatty acid ratio; a lower intake of red and processed meat; and a light to moderate intake of alcohol. The total score ranges from 0 (worst) to 9 (best) points.

**Table S1.** Criteria for scoring HEI-2015, AHEI-2010, and aMED scores

| Food Group                                             | HEI-2015<br>(0-100 points)     |                                   | AHEI-2010<br>(0-110 points)    |                                                 | aMED<br>(0-9 points)                         |                                            |
|--------------------------------------------------------|--------------------------------|-----------------------------------|--------------------------------|-------------------------------------------------|----------------------------------------------|--------------------------------------------|
|                                                        | Minimum                        | Maximum                           | Minimum                        | Maximum                                         | Minimum                                      | Maximum                                    |
| Total vegetables                                       | 0 points<br>0 cups/1000 kcal   | 5 points<br>≥ 1.1 cups/1000 kcal  | 0 points<br>0 servings/day     | 10 points<br>≥ 5 servings/day                   | 0 points<br>< median                         | 1 point<br>≥ median                        |
| Greens & beans                                         | 0 points<br>0 cups/1000 kcal   | 5 points<br>≥ 0.2 cups/1000 kcal  |                                |                                                 |                                              |                                            |
| Total fruit                                            | 0 points<br>0 cups/1000 kcal   | 5 points<br>≥ 0.8 cups/1000 kcal  | 0 points<br>0 servings/day     | 10 points<br>≥ 4 servings/day                   | 0 points<br>< median                         | 1 point<br>≥ median                        |
| Whole fruit                                            | 0 points<br>0 cups/1000 kcal   | 5 points<br>≥ 0.4 cups/1000 kcal  |                                |                                                 |                                              |                                            |
| Whole grains                                           | 0 points<br>0 oz/1000 kcal     | 10 points<br>≥ 1.5 oz/1000 kcal   | 0 points<br>0 g/day            | 10 points<br>75 g/day (women)<br>90 g/day (men) | 0 points<br>< median                         | 1 point<br>≥ median                        |
| Refined grains                                         | 0 points<br>≥ 4.3 oz/1000 kcal | 10 points<br>≤ 1.8 oz/1000 kcal   |                                |                                                 |                                              |                                            |
| All dairy                                              | 0 points<br>0 cups/1000 kcal   | 10 points<br>≥ 1.3 cups/1000 kcal |                                |                                                 |                                              |                                            |
| Juice                                                  |                                |                                   | 0 points<br>≥ 1 servings/day   | 10 points<br>0 servings/day                     |                                              |                                            |
| Total meat                                             | 0 points<br>0 oz/1000 kcal     | 5 points<br>≥ 2.5 oz/1000 kcal    |                                |                                                 |                                              |                                            |
| Nuts & legumes<br>(2 different categories for<br>AMED) |                                |                                   | 0 points<br>0 servings/day     | 10 points<br>≥ 1 servings/day                   | 0 points<br>< median<br>0 points<br>< median | 1 point<br>≥ median<br>1 point<br>≥ median |
| Red/processed meat                                     |                                |                                   | 0 points<br>≥ 1.5 servings/day | 10 points<br>0 servings/day                     | 0 points<br>≥ median                         | 1 point<br>< median                        |
| Seafood or plant protein                               | 0 points<br>0 oz/1000 kcal     | 5 points<br>≥ 0.8 oz/1000 kcal    |                                |                                                 |                                              |                                            |
| Fish                                                   |                                |                                   |                                |                                                 | 0 points<br>< median                         | 1 point<br>≥ median                        |
| Trans fats                                             |                                |                                   | 0 points<br>≥ 4% energy        | 10 points<br>≤ 0.5% energy                      |                                              |                                            |

| Food Group      | HEI-2015<br>(0-100 points)    |                                | AHEI-2010<br>(0-110 points) |                            | aMED<br>(0-9 points)        |                       |
|-----------------|-------------------------------|--------------------------------|-----------------------------|----------------------------|-----------------------------|-----------------------|
|                 | Minimum                       | Maximum                        | Minimum                     | Maximum                    | Minimum                     | Maximum               |
| Long-chain fats |                               |                                | 0 points<br>0 mg/day        | 10 points<br>250 mg/day    |                             |                       |
| PUFA            |                               |                                | 0 points<br>≤ 2% energy     | 10 points<br>≥ 0.5% energy |                             |                       |
| MUFA:SFA        |                               |                                |                             |                            | 0 points<br>< median        | 1 point<br>≥ median   |
| (MUFA+PUFA)/SFA | 0 points<br>≤ 1.2             | 10 points<br>≥ 2.5             |                             |                            |                             |                       |
| Saturated fats  | 0 points<br>≥ 16% energy      | 10 points<br>≤ 8% energy       |                             |                            |                             |                       |
| Sodium          | 0 points<br>≥ 2.0 g/1000 kcal | 10 points<br>≤ 1.1 g/1000 kcal | 0 points<br>Highest decile  | 10 points<br>Lowest decile |                             |                       |
| Alcohol         |                               |                                | 0 points                    | 10 points                  |                             |                       |
| Women           |                               |                                | ≥ 2.5 drinks/day            | 0.5-1.5 drinks/day         | 0 points<br><5 or >15 g/day | 1 point<br>5-15 g/day |
| Men             |                               |                                | ≥ 3.5 drinks/day            | 0.5-2.0 drinks/day         |                             |                       |
| Added sugars    | 0 points<br>≥ 26% energy      | 10 points<br>≤ 6.5% energy     |                             |                            |                             |                       |

*Abbreviations:* **HEI**, Healthy Eating Index; **AHEI**, Alternate Healthy Eating Index; **aMED**, alternate Mediterranean Diet score; **MUFA**, monounsaturated fatty acids; **SFA**, saturated fatty acids; **PUFA**, polyunsaturated fatty acids.

## **II. Supplementary analyses**

**Table S2.** Parkinson's disease clinical characteristics (n=98)

| <b>Clinical characteristic</b>                 | <b>Cases<br/>(n=98)</b> |
|------------------------------------------------|-------------------------|
| <b>Age at diagnosis, years</b>                 |                         |
| Mean (SD)                                      | 63.6 (9.9)              |
| Median (Min, Max)                              | 63.5 (34.0, 84.0)       |
| <b>PD duration, years</b>                      |                         |
| Mean (SD)                                      | 9.3 (4.8)               |
| Median (Min, Max)                              | 8.0 (0.0, 20.0)         |
| <b>PD phenotype</b>                            |                         |
| Tremor Dominant                                | 27 (27.6%)              |
| Postural instability and gait impairment       | 63 (64.3%)              |
| Indeterminate                                  | 8 (8.2%)                |
| <b>MDS-UPDRS</b>                               |                         |
| <b>Part IA (non-motor)</b>                     |                         |
| Mean (SD)                                      | 3.6 (3.1)               |
| Median (Min, Max)                              | 3.0 (0.0, 14.0)         |
| <b>Part IB (non-motor)</b>                     |                         |
| Mean (SD)                                      | 10.3 (4.9)              |
| Median (Min, Max)                              | 10.0 (1.0, 24.0)        |
| <b>Part II (motor)</b>                         |                         |
| Mean (SD)                                      | 16.4 (8.3)              |
| Median (Min, Max)                              | 15.9 (1.0, 41.0)        |
| <b>Part III (motor)</b>                        |                         |
| Mean (SD)                                      | 27.4 (12.5)             |
| Median (Min, Max)                              | 27.0 (3.0, 58.2)        |
| <b>Non-Motor Symptom Assessment Scale</b>      |                         |
| Mean (SD)                                      | 51.2 (44.2)             |
| Median (Min, Max)                              | 38.5 (0.0, 172.0)       |
| <b>Mini Mental State Exam</b>                  |                         |
| Mean (SD)                                      | 27.9 (3.0)              |
| Median (Min, Max)                              | 29.0 (7.0, 30.0)        |
| <b>Geriatric Depression Scale-15</b>           |                         |
| Mean (SD)                                      | 3.8 (3.0)               |
| Median (Min, Max)                              | 3.0 (0.0, 12.0)         |
| <b>Wexner score</b>                            |                         |
| Mean (SD)                                      | 6.8 (3.7)               |
| Median (Min, Max)                              | 6.0 (0.0, 16.0)         |
| <b>Chronic constipation required laxatives</b> |                         |
| No                                             | 66 (67.3%)              |
| Yes                                            | 32 (32.7%)              |

| <b>Clinical characteristic</b>     | <b>Cases<br/>(n=98)</b> |
|------------------------------------|-------------------------|
| <b>Depression</b>                  |                         |
| No                                 | 64 (65.3%)              |
| Yes                                | 34 (34.7%)              |
| <b>REM sleep behavior disorder</b> |                         |
| No                                 | 77 (78.6%)              |
| Yes                                | 21 (21.4%)              |
| <b>Dopamine agonists use</b>       |                         |
| No                                 | 31 (31.6%)              |
| Yes                                | 67 (68.4%)              |
| <b>Levodopa use</b>                |                         |
| No                                 | 12 (12.2%)              |
| Yes                                | 86 (87.8%)              |
| <b>LED Dopamine agonists, mg</b>   |                         |
| Mean (SD)                          | 158.9 (169.7)           |
| Median (Min, Max)                  | 115.0 (0.0, 800.0)      |
| <b>LED Levodopa, mg</b>            |                         |
| Mean (SD)                          | 638.1 (539.7)           |
| Median (Min, Max)                  | 510.6 (0.0, 2793.0)     |
| <b>LED total, mg</b>               |                         |
| Mean (SD)                          | 800.1 (605.5)           |
| Median (Min, Max)                  | 680.6 (0.0, 3133.0)     |
| <b>Levodopa:LED total</b>          |                         |
| Mean (SD)                          | 0.7 (0.3)               |
| Median (Min, Max)                  | 0.8 (0.0, 1.0)          |

*Abbreviations: PD, Parkinson's disease; SD, standard deviation; MDS, UPDRS, Movement Disorder Society, Unified Parkinson's Disease Rating Scale; LED, Levodopa Equivalent Daily Dose.*

**Table S3.** Association of dietary patterns and components with Parkinson’s disease status according to constipation (N = 181)

|                        |             | <b>Constipation</b>            |                                |
|------------------------|-------------|--------------------------------|--------------------------------|
|                        |             | <b>No</b>                      | <b>Yes</b>                     |
| <b>Cases/controls</b>  |             | 47/58                          | 51/25                          |
| <b>Dietary pattern</b> | <b>Unit</b> | <b>OR (95% CI)<sup>a</sup></b> | <b>OR (95% CI)<sup>a</sup></b> |
| HEI                    | 10-point    | 0.66 (0.39, 1.07)              | 0.76 (0.40, 1.44)              |
| AHEI                   | 10-point    | 0.60 (0.34, 1.01)              | 0.60 (0.30, 1.14)              |
| aMED                   | 1-point     | 0.85 (0.64, 1.11)              | 0.78 (0.54, 1.11)              |
| <b>Nutrient</b>        |             |                                |                                |
| Carbohydrates          | 10 g/d      | 1.13 (1.02, 1.28)              | 1.45 (1.17, 1.89)              |
| Protein                | 10 g/d      | 0.86 (0.62, 1.16)              | 0.40 (0.21, 0.65)              |
| Fat                    | 10 g/d      | 0.84 (0.63, 1.10)              | 0.72 (0.44, 1.13)              |
| Trans fats             | 1 g/d       | 1.80 (1.12, 3.06)              | 1.31 (0.87, 2.11)              |
| MUFA                   | 10 g/d      | 0.73 (0.40, 1.26)              | 0.53 (0.21, 1.28)              |
| PUFA                   | 10 g/d      | 0.62 (0.27, 1.33)              | 1.17 (0.34, 4.19)              |
| Total sugars           | 10 g/d      | 1.17 (1.04, 1.35)              | 1.35 (1.11, 1.74)              |
| Added sugars           | 10 g/d      | 1.34 (1.13, 1.68)              | 1.39 (1.12, 1.81)              |
| Fiber                  | 10 g/d      | 0.57 (0.27, 1.08)              | 0.49 (0.21, 1.11)              |
| Folate                 | 100 µg/d    | 0.68 (0.39, 1.07)              | 0.54 (0.28, 0.95)              |
| Alcohol                | 10 g/d      | 0.84 (0.62, 1.10)              | 0.69 (0.41, 1.15)              |
| Caffeine               | 100 mg/d    | 0.80 (0.64, 0.97)              | 0.68 (0.49, 0.87)              |
| <b>Food group</b>      |             |                                |                                |
| Vegetables             | 100 g/d     | 0.69 (0.36, 1.14)              | 0.65 (0.35, 1.17)              |
| Fruits                 | 100 g/d     | 0.86 (0.48, 1.52)              | 0.93 (0.54, 1.63)              |
| Refined grains         | 10 g/d      | 1.02 (0.93, 1.15)              | 1.02 (0.87, 1.19)              |
| Nuts                   | 100 g/d     | 0.61 (0.26, 1.21)              | 0.57 (0.20, 1.70)              |
| Processed meat         | 10 g/d      | 1.04 (0.83, 1.33)              | 1.03 (0.75, 1.45)              |

*Abbreviations:* **OR**, odds ratio; **CI**, confidence interval; **HEI**, Healthy Eating Index; **AHEI**, Alternate Healthy Eating Index; **aMED**, alternate Mediterranean Diet score; **MUFA**, monounsaturated fatty acids; **PUFA**, polyunsaturated fatty acids.

<sup>a</sup>Adjusted for age, gender, smoking, BMI, and energy intake.



**Table S4.** Association of dietary patterns and components with Parkinson’s disease according to gender (N = 181)

|                        |             | <b>Gender</b>                  |                                |
|------------------------|-------------|--------------------------------|--------------------------------|
|                        |             | <b>Men</b>                     | <b>Women</b>                   |
| <b>Cases/controls</b>  |             | 66/30                          | 32/53                          |
| <b>Dietary pattern</b> | <b>Unit</b> | <b>OR (95% CI)<sup>a</sup></b> | <b>OR (95% CI)<sup>a</sup></b> |
| HEI                    | 10-point    | 0.69 (0.42, 1.10)              | 0.57 (0.31, 1.01)              |
| AHEI                   | 10-point    | 0.93 (0.53, 1.63)              | 0.38 (0.20, 0.68)              |
| aMED                   | 1-point     | 0.85 (0.64, 1.11)              | 0.73 (0.53, 0.98)              |
| <b>Nutrient</b>        |             |                                |                                |
| Carbohydrates          | 10 g/d      | 1.19 (1.05, 1.37)              | 1.23 (1.06, 1.46)              |
| Total protein          | 10 g/d      | 0.72 (0.53, 0.95)              | 0.74 (0.47, 1.12)              |
| Total fat              | 10 g/d      | 0.88 (0.64, 1.19)              | 0.70 (0.48, 0.98)              |
| Trans fats             | 1 g/d       | 1.86 (1.21, 3.09)              | 1.38 (0.89, 2.29)              |
| MUFA                   | 10 g/d      | 0.85 (0.47, 1.55)              | 0.43 (0.18, 0.89)              |
| PUFA                   | 10 g/d      | 0.66 (0.27, 1.59)              | 0.68 (0.27, 1.66)              |
| Total sugars           | 10 g/d      | 1.20 (1.05, 1.41)              | 1.27 (1.09, 1.53)              |
| Added sugars           | 10 g/d      | 1.55 (1.24, 2.06)              | 1.30 (1.09, 1.60)              |
| Fiber                  | 10 g/d      | 0.67 (0.35, 1.21)              | 0.31 (0.11, 0.73)              |
| Folate                 | 100 µg/d    | 0.61 (0.36, 0.96)              | 0.55 (0.27, 0.98)              |
| Alcohol                | 10 g/d      | 0.85 (0.66, 1.08)              | 0.66 (0.31, 1.17)              |
| Caffeine               | 100 mg/d    | 0.84 (0.71, 0.99)              | 0.51 (0.30, 0.77)              |
| <b>Food group</b>      |             |                                |                                |
| Vegetables             | 100 g/d     | 0.76 (0.45, 1.25)              | 0.45 (0.17, 0.93)              |
| Fruits                 | 100 g/d     | 0.83 (0.51, 1.36)              | 0.97 (0.52, 1.76)              |
| Refined grains         | 10 g/d      | 1.05 (0.94, 1.20)              | 1.03 (0.90, 1.18)              |
| Nuts                   | 100 g/d     | 0.76 (0.37, 1.56)              | 0.28 (0.07, 0.83)              |
| Processed meat         | 10 g/d      | 0.88 (0.71, 1.09)              | 1.68 (1.17, 2.58)              |

*Abbreviations:* **OR**, odds ratio; **CI**, confidence interval; **HEI**, Healthy Eating Index; **AHEI**, Alternate Healthy Eating Index; **aMED**, alternate Mediterranean Diet score; **MUFA**, monounsaturated fatty acids; **PUFA**, Polyunsaturated fatty acids.

<sup>a</sup>Adjusted for age, smoking, BMI, and energy intake.

**Table S5.** Associations of dietary patterns and components with Parkinson’s disease status using conditional logistic regression with matched pairs (n = 166)

| <b>Dietary Pattern</b> | <b>Unit</b> | <b>OR (95% CI)<sup>a</sup></b> |
|------------------------|-------------|--------------------------------|
| HEI                    | 10-point    | 0.69 (0.42, 1.13)              |
| AHEI                   | 10-point    | 0.65 (0.37, 1.13)              |
| aMED                   | 1-point     | 0.85 (0.62, 1.17)              |

*Abbreviations:* **OR**, odds ratio; **CI**, confidence interval; **HEI**, Healthy Eating Index; **AHEI**, Alternate Healthy Eating Index; **aMED**, alternate Mediterranean Diet score.

<sup>a</sup>Adjusted for age, gender, smoking status, BMI, and energy intake.

**Table S6.** Association of Parkinson’s duration and age at diagnosis with specific nutrient intake (n = 98)

| <b>PD duration, years</b>      | <b>Unit</b> | <b><math>\beta</math> (95% CI)<sup>a</sup></b> |
|--------------------------------|-------------|------------------------------------------------|
| Carbohydrates                  | 10 g/d      | 4.15 (-0.11, 8.41)                             |
| Trans fats                     | 1 g/d       | 0.11 (0.02, 0.21)                              |
| Total sugars                   | 10 g/d      | 2.80 (0.29, 5.31)                              |
| Added sugars                   | 10 g/d      | 1.93 (0.10, 3.77)                              |
| <b>Age at diagnosis, years</b> |             |                                                |
| Carbohydrates                  | 10 g/d      | -4.08 (-7.99, -0.18)                           |
| Trans fats                     | 1 g/d       | -0.09 (-0.18, -0.01)                           |
| Total sugars                   | 10 g/d      | -2.83 (-5.13, -0.54)                           |
| Added sugars                   | 10 g/d      | -2.32 (-3.98, -0.66)                           |

*Abbreviations:* **SD**, standard deviation; **PD**, Parkinson’s disease; **CI**, confidence interval.

<sup>a</sup>Coefficients are from linear regressions of nutrients on PD duration and age at diagnosis. Adjusted for age and gender.

**Table S7.** Association of Parkinson’s disease clinical features with diet (n = 98)

| <b>Clinical feature (present vs. absent)</b> | <b>Unit</b>   | <b><math>\beta</math> (95% CI)<sup>a</sup></b> |
|----------------------------------------------|---------------|------------------------------------------------|
| <b>Non-motor symptom<sup>b</sup></b>         |               |                                                |
| Trans fats                                   | 1 g/d         | 1.23 (0.31, 2.14)                              |
| Refined grains                               | 10 g/d        | 2.65 (0.24, 5.06)                              |
| <b>Daytime sleepiness<sup>c</sup></b>        |               |                                                |
| Total sugars                                 | 10 g/d        | 2.68 (0.11, 5.24)                              |
| Trans fats                                   | 1 g/d         | 1.06 (0.14, 1.98)                              |
| <b>Restless sleep<sup>d</sup></b>            |               |                                                |
| Carbohydrates                                | 10 g/d        | 6.06 (1.72, 10.39)                             |
| Trans fats                                   | 1 g/d         | 1.09 (0.10, 2.07)                              |
| Total sugars                                 | 10 g/d        | 3.53 (0.95, 6.10)                              |
| <b>Cognitive impairment<sup>e</sup></b>      |               |                                                |
| Protein                                      | 10 g/d        | -4.01 (-7.33, -0.68)                           |
| Fiber                                        | 10 g/d        | -1.01 (-1.94, -0.09)                           |
| Folate                                       | 100 $\mu$ g/d | -1.30 (-2.52, -0.08)                           |
| <b>Motor symptom<sup>f</sup></b>             |               |                                                |
| AHEI                                         | 10-point      | -0.36 (-0.73, 0.01)                            |

*Abbreviations:* **PD**, Parkinson’s disease; **UPDRS**, Unified Parkinson’s Disease Rating Scale; **NMSS**, Non-Motor Symptom Assessment Scale; **MMSE**, Mini Mental State Exam; **HEI**, Healthy Eating Index; **AHEI**, Alternate Healthy Eating Index; **aMED**, alternate Mediterranean Diet score.

<sup>a</sup>Coefficients are from linear regressions of dietary patterns and components on clinical features. Adjusted for age and gender.

<sup>b</sup>UPDRS IB non-motor aspects of experiences of daily living items (present:  $\geq 9$  points; absent:  $< 9$  points).

<sup>c</sup>NMSS daytime sleepiness frequency  $\times$  severity score (present:  $> 0$  point ; absent: 0 point).

<sup>d</sup>NMSS restless sleep frequency  $\times$  severity score (present:  $> 0$  point ; absent: 0 point).

<sup>e</sup>MMSE cognitive impairment score (present:  $< 24$  points ; absent:  $\geq 24$  points).

<sup>f</sup>UPDRS III motor symptom severity and progression (present:  $\geq 35$  points; absent  $< 35$  points).

## REFERENCES

- [1] S.M. Krebs-Smith, T.E. Pannucci, A.F. Subar, S.I. Kirkpatrick, J.L. Lerman, J.A. Tooze, M.M. Wilson, J. Reedy, Update of the Healthy Eating Index: HEI-2015, *J Acad Nutr Diet* 118(9) (2018) 1591-1602.
- [2] M.L. McCullough, D. Feskanich, M.J. Stampfer, E.L. Giovannucci, E.B. Rimm, F.B. Hu, D. Spiegelman, D.J. Hunter, G.A. Colditz, W.C. Willett, Diet quality and major chronic disease risk in men and women: moving toward improved dietary guidance, *Am J Clin Nutr* 76(6) (2002) 1261-71.
- [3] T.T. Fung, M.L. McCullough, P.K. Newby, J.E. Manson, J.B. Meigs, N. Rifai, W.C. Willett, F.B. Hu, Diet-quality scores and plasma concentrations of markers of inflammation and endothelial dysfunction, *American Journal of Clinical Nutrition* 82(1) (2005) 163-173.
- [4] A. Trichopoulou, T. Costacou, C. Bamia, D. Trichopoulos, Adherence to a Mediterranean diet and survival in a Greek population, *N Engl J Med* 348(26) (2003) 2599-608.
- [5] A. Trichopoulou, A. Kourisblazos, M.L. Wahlqvist, C. Gnardellis, P. Lagiou, E. Polychronopoulos, T. Vassilakou, L. Lipworth, D. Trichopoulos, Diet and Overall Survival in Elderly People, *Bmj-Brit Med J* 311(7018) (1995) 1457-1460.
- [6] T.T. Fung, F.B. Hu, M.L. McCullough, P.K. Newby, W.C. Willett, M.D. Holmes, Diet quality is associated with the risk of estrogen receptor-negative breast cancer in postmenopausal women., *Journal of Nutrition* 136(2) (2006) 466-472.
